# Supplementary material for: Juvenile myelomonocytic leukaemia and Noonan syndrome
Source: HighWire-hosted journal article supplement (doi:10.1136/jmedgenet-2014-102611), 2014-08-05
Supplement: jmedgenet-2014-102611supp_table.pdf [file jmedgenet-2014-102611supp_table.pdf]

**Supplementary table 1.** Relative distribution of *PTPN11* mutations in sporadic JMML in the whole cohort of NS patients and in NS-JMML/MPD patients according to functional classes defined by Tartaglia *et al.* (17). The prevalence of these mutations in an external cohort of somatic *PTPN11* mutations including various types of leukemia (n=256) (17) is given.

| Group        | Predicted effect on SHP2 function          | Germline <i>PTPN11</i> mutations |                    | Somatic <i>PTPN11</i> mutations |                               |
|--------------|--------------------------------------------|----------------------------------|--------------------|---------------------------------|-------------------------------|
|              |                                            | NS (n=638)                       | NS-JMML/MPD (n=36) | Sporadic JMML (n=32)            | Tartaglia et al. (17) (n=256) |
| <b>I</b>     | active/inactive switching                  | 33%                              | 53%                | 94%                             | 85%                           |
| <b>II</b>    | active/inactive switching and catalysis    | 10%                              | 3%                 | -                               | 1%                            |
| <b>III</b>   | active/inactive switching and specificity  | 5%                               | 8%                 | 6%                              | 10%                           |
| <b>IV</b>    | active/inactive switching and/or catalysis | 34%                              | 22%                | -                               | 2%                            |
| <b>V</b>     | SH2 pY binding                             | 6%                               | 14%                | -                               | 2%                            |
| <b>VI</b>    | SH2 orientation and mobility               | 2%                               | -                  | -                               | -                             |
| <b>Other</b> | -                                          | 9%                               | -                  | -                               | -                             |
| <b>Total</b> |                                            | <b>100%</b>                      | <b>100%</b>        | <b>100%</b>                     | <b>100%</b>                   |
